# Supplementary material for: High Fat/High Glucose Diet Induces Metabolic Syndrome in an Experimental Rat Model
Source: PubMed Central journal article supplement (PMC6213024; doi:10.3390/nu10101502), 2018-10-14
Supplement: nutrients-10-01502-s001.pdf [file nutrients-10-01502-s001.pdf]

Table S1: Primers used for RT-qPCR in the study.

| Gene          | Full name                                           | 5'→3' primer sequence                                        |
|---------------|-----------------------------------------------------|--------------------------------------------------------------|
| 18S           | 18S ribosomal RNA                                   | F: cgccgctagaggtgaaattct<br>R: cattcttggcaaatgctttcg         |
| FAS           | Fatty Acid Synthase                                 | F: ggccacctcagtcctgttat<br>R: agggctccagctagagggtaca         |
| aP2           | Adipocyte Protein 2                                 | F: aatgtgagcgcctttgt<br>R: tgatgatcaagttgggcttg              |
| PPAR $\alpha$ | Peroxisome proliferator activated receptor $\alpha$ | F: tgcggactaccagtacttaggg<br>R: gctggagagagggtgtctgt         |
| Mcad          | Medium-Chain Acyl-CoA Dehydrogenase                 | F: cttagcttctgcctgtggt<br>R: tgagagacacttctcaggacctt         |
| Lcad          | Long-Chain Acyl-CoA Dehydrogenase                   | F: gcagttacttgggaagagcaa<br>R: ggcatgacaatatctgaatgga        |
| Cpt1 $\beta$  | Carnitine palmitoyltransferase 1 $\beta$            | F: ctcctttcctggacgaggt<br>R: gatctggaactgggggatct            |
| Pdk4          | Pyruvate dehydrogenase kinase 4                     | F: gagctgttctcccgtacag<br>R: agttctctcacaggcattttctg         |
| PGC1 $\alpha$ | PPAR $\gamma$ Coactivator 1 $\alpha$                | F: aaagggccaagcagagaga<br>R: gtaaatacacacggcgctctt           |
| PGC1 $\beta$  | PPAR $\gamma$ Coactivator 1 $\beta$                 | F: ttgacagtggagctttgtgg<br>R: gggcttataaggaggtgtgg           |
| Tfam          | Mitochondrial transcription factor A                | F: agctaaacacccagatgcaaa<br>R: tcagctttaaataccgcttca         |
| Mfn2          | Mitofusin-2                                         | F: tcctgggcccctaagaatagc<br>R: gagaggacgctgaacctgat          |
| Nrf1          | Nuclear respiratory factor 1                        | F: atagtctgtctgggaaacc<br>R: tccatgcatgaactccatct            |
| Tfb2m         | Mitochondrial Transcription Factor B2               | F: caaaacccatcccatcaact<br>R: tcagctttaaataccgcttca          |
| Opa1          | Mitochondrial dynamin-like GTPase                   | F: ggatttcttactgaggta<br>R: cggatcatgatctgttgc               |
| Leptin        | Leptin                                              | F: ccaggatcaatgacatttaca<br>R: aatgaagtccaaccggtga           |
| LeptR         | Leptin receptor                                     | F: tgtcagaaattctatgtggtttgt<br>R: ttggataggccagggttaagtg     |
| Adiponectin   | Adiponectin                                         | F: tggtcacaatgggataccg<br>R: cccttaggaccaagaacacct           |
| InsR          | Insulin Receptor                                    | F: cagaaaaaccttctcaggcaat<br>R: ttcaagggatcttcgctttc         |
| Cox1          | Cytochrome C oxidase 1                              | F: tcggaacccctctacctattttg<br>R: ctcgaattagaatacttaaagctgtcc |
| CycloA        | Cyclophilin A                                       | F: ccccatctgctcgaata<br>R: tttgcaatcctgctagacttga            |
